# Supplementary material
Source: PubMed Central journal article supplement (PMC2881173)

# Supplemental figure S1

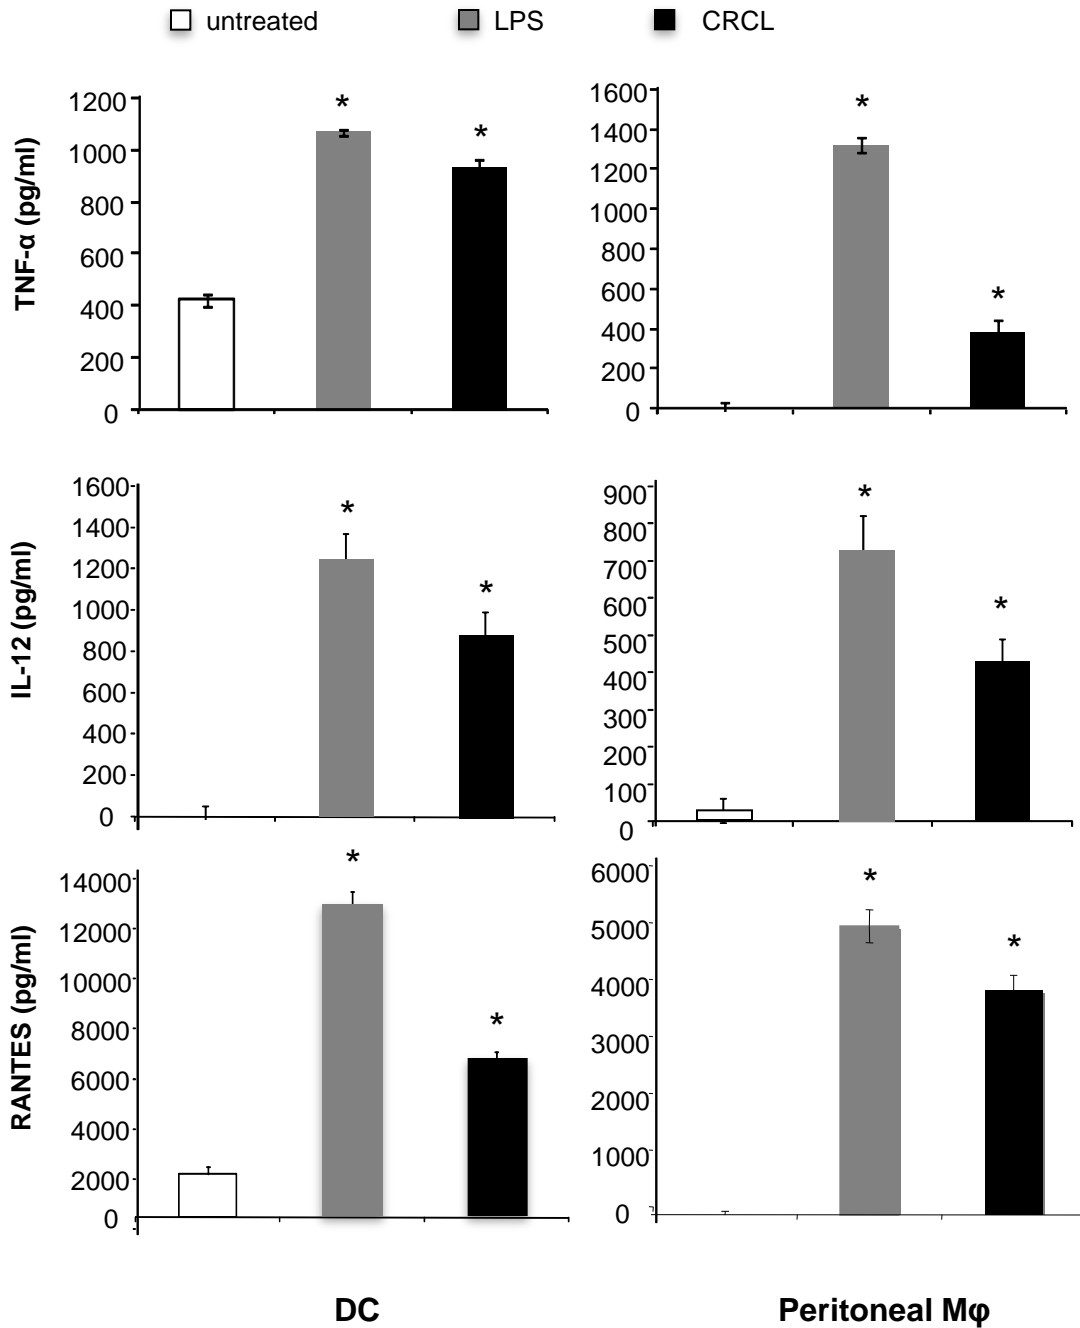

Supplement: NIHMS149207-supplement-01.pdf [file NIHMS149207-supplement-01.pdf]
